# Supplementary material for: Utilising a Behaviour Change Model to Improve Implementation of the Activate Injury Prevention Exercise Programme in Schoolboy Rugby Union
Source: MDPI journal article supplement (doi:10.3390/ijerph18115681), 2021-05-26
Supplement: s1 [file s1]

**Table S1.** Survey key to show questions used at different timepoints

| Question/ Statement                                                     | HAPA Construct | Responses                                                                                                                                       | Time Point |               |             |
|-------------------------------------------------------------------------|----------------|-------------------------------------------------------------------------------------------------------------------------------------------------|------------|---------------|-------------|
|                                                                         |                |                                                                                                                                                 | Baseline   | Post-workshop | Post-season |
| What is your role?                                                      |                | <b>Select One:</b><br>Director of Sport<br>Head coach<br>Assistant coach<br>Team manager<br>Conditioning Coach<br>Medical practitioner<br>Other | A          |               |             |
| If coaching, how many years coaching experience do you have?            |                | <b>Select One:</b><br>Never<br>Less than 2 years<br>2-3 years<br>4-5 years<br>6 years+                                                          | A          |               |             |
| - What is the highest level you have coached?                           |                | <b>Select One:</b><br>School/club<br>Regional academy<br>County/constituent body<br>Divisional<br>Professional<br>International                 | A          |               |             |
| - What is the highest coaching qualification you hold?                  |                | <b>Select One:</b><br>RFU Level 1<br>RFU Level 2<br>RFU Level 3<br>RFU Level 4<br>Other                                                         | A          |               |             |
| - When was this coaching qualification attained (please tick 1 answer)? |                | <b>Select One:</b><br>Less than 2 years<br>2-3 years<br>4-5 years<br>More than 5 years ago                                                      | A          |               |             |
| - What age group do you coach/play in?                                  |                | <b>Select One:</b><br>Under-12<br>-<br>Under-19<br>Various                                                                                      | A          |               |             |
| When was the last time you completed an official RFU course?            |                | <b>Select One:</b><br>Less than 2 years ago<br>2-3 years<br>4-5 years<br>6+ years ago                                                           | A          |               |             |
| Have you previously played competitive rugby?                           |                | <b>Select One:</b><br>No<br>Yes                                                                                                                 | A          |               |             |
| - If yes, what is the highest level you have played?                    |                | <b>Select One:</b><br>School<br>Age group community<br>Junior academy                                                                           | A          |               |             |

|                                                                                                                                                                                                                                                                                                                   |    |                                                                                |   |  |   |
|-------------------------------------------------------------------------------------------------------------------------------------------------------------------------------------------------------------------------------------------------------------------------------------------------------------------|----|--------------------------------------------------------------------------------|---|--|---|
|                                                                                                                                                                                                                                                                                                                   |    | University<br>Adult community<br>Professional<br>International                 |   |  |   |
| Do you have a current medical or first aid qualification?                                                                                                                                                                                                                                                         |    | <b>Select One:</b><br>No<br>Yes                                                | A |  |   |
| Have you ever used a specific programme to reduce your players injury risk?                                                                                                                                                                                                                                       |    |                                                                                | A |  |   |
| In your opinion, <b>how serious</b> are the following types of Rugby injuries?<br><ul style="list-style-type: none"> <li>- Ankle sprain</li> <li>- Knee ligament sprain</li> <li>- Muscle strain</li> <li>- Concussion</li> <li>- Bone/fracture</li> <li>- Bruise/contusion</li> <li>- Shoulder injury</li> </ul> |    | <b>7-point Likert Scale:</b><br>1. Not serious<br>–<br>7. Very Serious         |   |  |   |
| Rugby injuries can <b>shorten a player's career</b>                                                                                                                                                                                                                                                               |    | <b>7-point Likert Scale:</b><br>1. Strongly Agree<br>–<br>7. Strongly Disagree | B |  | B |
| Rugby injuries can cause <b>physical problems later in life</b>                                                                                                                                                                                                                                                   |    |                                                                                | B |  | B |
| Rugby injuries have a <b>negative impact on team performance</b>                                                                                                                                                                                                                                                  |    |                                                                                | B |  | B |
| Rugby injuries have a <b>negative impact on a player's quality of life</b>                                                                                                                                                                                                                                        |    |                                                                                | B |  | B |
| Rugby players are at <b>high risk of suffering an injury</b>                                                                                                                                                                                                                                                      | RP |                                                                                | B |  | B |
| I expect a player I coach to <b>sustain a Rugby injury</b> sometime during the next season                                                                                                                                                                                                                        | RP |                                                                                | B |  | B |
| It is <b>possible to prevent</b> some Rugby injuries                                                                                                                                                                                                                                                              | OE |                                                                                | C |  | C |
| Exercises which have been <b>shown to prevent</b> injuries should be performed by Rugby players                                                                                                                                                                                                                   |    |                                                                                | C |  | C |
| Exercises to prevent injuries should be <b>varied and progressed</b> over time                                                                                                                                                                                                                                    |    |                                                                                | C |  | C |
| Exercises which have been <b>shown to prevent</b> injuries should be incorporated into Schools Rugby training                                                                                                                                                                                                     |    |                                                                                | C |  | C |
| Completing a Rugby specific warm-up programme prior to every game and training session will <b>reduce the risk</b> of players sustaining an injury                                                                                                                                                                |    |                                                                                | C |  | C |
| Completing a Rugby specific warm-up programme prior to every game and training session <b>will improve</b> physical characteristics such as balance, agility and strength                                                                                                                                         |    |                                                                                | C |  | C |
| <b>Balance</b> exercises can prevent Rugby injuries                                                                                                                                                                                                                                                               |    |                                                                                | C |  | C |
| <b>Controlled jumping/landing</b> exercises can prevent Rugby injuries                                                                                                                                                                                                                                            |    |                                                                                | C |  | C |
| A <b>warm-up jog/run</b> can prevent Rugby injuries                                                                                                                                                                                                                                                               |    |                                                                                | C |  | C |

|                                                                                                                                                                                                                                                                                                                 |    |                                                                         |   |   |   |
|-----------------------------------------------------------------------------------------------------------------------------------------------------------------------------------------------------------------------------------------------------------------------------------------------------------------|----|-------------------------------------------------------------------------|---|---|---|
| <b>Cutting exercises</b> can prevent Rugby injuries                                                                                                                                                                                                                                                             |    |                                                                         | C |   | C |
| <b>Cool-down jog/run</b> can prevent Rugby injuries                                                                                                                                                                                                                                                             |    |                                                                         | C |   | C |
| Resisted shoulder exercises can prevent <b>shoulder injuries</b> in Rugby                                                                                                                                                                                                                                       |    |                                                                         | C |   | C |
| Neck muscle strengthening can prevent <b>concussion</b> in Rugby                                                                                                                                                                                                                                                |    |                                                                         | C |   | C |
| I would like my team to complete a Rugby specific warm-up programme prior to every game and training session next season                                                                                                                                                                                        |    |                                                                         | C |   | C |
| <b>Who is responsible</b> for Rugby injury prevention? <ul style="list-style-type: none"> <li>- Head coach</li> <li>- Assistant coach</li> <li>- Team manager</li> <li>- Strength and conditioning/fitness coach</li> <li>- School medical practitioner</li> <li>- Player</li> <li>- Parent/guardian</li> </ul> |    | Tick all that apply                                                     |   |   |   |
| Had you <b>heard of 'Activate'</b> before taking part in this survey?                                                                                                                                                                                                                                           |    | Select One:<br>Yes<br>No<br>Unsure                                      | D |   |   |
| <ul style="list-style-type: none"> <li>- If yes, where did you heard about it? <ul style="list-style-type: none"> <li>- RFU Website</li> <li>- Community Rugby Coaches</li> <li>- Peers</li> <li>- Social media</li> </ul> </li> </ul>                                                                          |    | Tick all that apply                                                     |   |   |   |
| Have you <b>ever used</b> 'Activate'?                                                                                                                                                                                                                                                                           |    | Select One:<br>Yes<br>No<br>Unsure                                      | D |   |   |
| Does your team <b>currently use</b> 'Activate'?                                                                                                                                                                                                                                                                 |    |                                                                         | D |   | E |
| Does 'Activate' need to be <b>improved for use</b> in your team?                                                                                                                                                                                                                                                |    |                                                                         |   |   |   |
| Should your school <b>develop its own version</b> of 'Activate'?                                                                                                                                                                                                                                                |    |                                                                         |   |   |   |
| 'Activate' can <b>prevent</b> Rugby injuries in your team                                                                                                                                                                                                                                                       | OE | 7-point Likert Scale:<br>1. Strongly Agree<br>—<br>7. Strongly Disagree |   | E | E |
| 'Activate' is <b>Rugby specific</b>                                                                                                                                                                                                                                                                             |    |                                                                         |   |   |   |
| 'Activate' is <b>too long</b>                                                                                                                                                                                                                                                                                   |    |                                                                         |   |   |   |
| 'Activate' contains adequate <b>variation and progression</b> for our team                                                                                                                                                                                                                                      |    |                                                                         |   |   |   |
| 'Activate' could be <b>maintained</b> over multiple seasons by our team                                                                                                                                                                                                                                         |    |                                                                         |   |   |   |
| In your opinion, what happened to your players' <b>overall risk of injury</b> as they                                                                                                                                                                                                                           |    | 7-point Likert Scale:<br>1. Extremely Increase                          |   |   |   |

|                                                                                                                                                                                                          |     |                                                                                           |  |   |   |
|----------------------------------------------------------------------------------------------------------------------------------------------------------------------------------------------------------|-----|-------------------------------------------------------------------------------------------|--|---|---|
| completed 'Activate' in training or prior to match play playing this season?                                                                                                                             |     | -<br>7. Extremely Decreased                                                               |  |   |   |
| How confident are you that <b><i>you understand 'Activate'</i></b> well enough to use it with the School team(s) you are coaching for the upcoming season?                                               | TSE | 7-point Likert Scale:<br>1. Extremely Confident<br>-<br>7. Extremely Unconfident          |  | E | E |
| How confident are you that <b><i>you have the ability to use 'Activate'</i></b> with the School team(s) you are coaching for the upcoming season?                                                        | TSE |                                                                                           |  | E | E |
| What <b><i>resources were available</i></b> to help you complete 'Activate' with your team at every game and training session during the upcoming season?                                                |     | Free Text Box                                                                             |  |   |   |
| What <b><i>barriers prevented or impeded you</i></b> from the completing 'Activate' with your team at every game and training session during the upcoming season?                                        |     | Free Text Box                                                                             |  |   |   |
| If there was <b><i>limited space</i></b> at your practice or game venue, how confident were you that your team could complete 'Activate'?                                                                | MSE | 7-point Likert Scale:<br>1. Extremely Confident<br>-<br>7. Extremely Unconfident          |  | E | E |
| If the players on your team <b><i>did not enjoy</i></b> performing 'Activate', how confident were you that you could still have them complete it at every game and training session?                     | MSE |                                                                                           |  | E | E |
| If you were to start the season by completing 'Activate' with your team at every game and training session, how confident are you that you could continue to do so for the <b><i>entire season</i></b> ? | MSE |                                                                                           |  | E | E |
| If you <b><i>missed completing the programme</i></b> at a game or training, how confident were you that you could start completing it again the next session?                                            | RSE |                                                                                           |  | E | E |
| On average, how <b><i>many times a week</i></b> did your team complete 'Activate' <b><i>during this season</i></b> ?                                                                                     |     | Select One:<br>Never<br><1 x per week<br>1 x per week<br>2 x per week<br>3 x per week     |  |   | E |
| On average, <b><i>how long did it take</i></b> your team to complete 'Activate' <b><i>during training</i></b> ?                                                                                          |     | Select One:<br>We didn't<br>5-10 minutes<br>10-15 minutes<br>15-20 minutes<br>>20 minutes |  |   |   |
| On average, <b><i>how long did it take</i></b> your team to complete 'Activate' <b><i>before matches</i></b> ?                                                                                           |     |                                                                                           |  |   |   |
| What are some of the things you <b><i>did like</i></b> about doing 'Activate' with your team before training or matches?                                                                                 |     | Tick all that apply:<br>Various prefilled responses                                       |  |   |   |
| What were some of the things you <b><i>did not</i></b> like about doing 'Activate' with your team before training or matches ( <b><i>tick as many as appropriate</i></b> ).                              |     |                                                                                           |  |   |   |

|                                                                                                                                        |     |                                                                                   |  |   |   |
|----------------------------------------------------------------------------------------------------------------------------------------|-----|-----------------------------------------------------------------------------------|--|---|---|
| What <b>changes would you recommend</b> to 'Activate' in terms of content or delivery structure                                        |     |                                                                                   |  |   |   |
| Do you intend to make <b><i>injury prevention a priority</i></b> for your team in the upcoming season?                                 |     | <b>7-point Likert Scale:</b><br>1. Extremely Likely<br>-<br>7. Extremely Unlikely |  |   |   |
| Do you <b><i>intend to complete</i></b> 'Activate' with your team at every game and training session in the upcoming season?           | INT |                                                                                   |  | E | E |
| Do you have concrete plans on how to <b><i>teach</i></b> 'Activate' to the players on your School team?                                | AP  | <b>7-point Likert Scale:</b><br>1. Strongly Agree<br>-<br>7. Strongly Disagree    |  | E | E |
| Do you have concrete plans on <b><i>when</i></b> to have your team complete 'Activate'?                                                | AP  |                                                                                   |  | E | E |
| Do you have concrete plans on how to <b><i>deal with challenges</i></b> in order to stick to your intentions of completing 'Activate'? | CP  |                                                                                   |  | E | E |
| Do you have concrete plans on how to <b><i>encourage your team</i></b> to perform 'Activate' to the best of their ability?             | CP  |                                                                                   |  | E | E |

**Abbreviation Key:**

TSE = task self-efficacy  
 OE = outcome expectancy  
 RP = risk perception  
 INT = intention  
 AP = action plans  
 CP = coping plans  
 MSE = maintenance self-efficacy  
 RSE = recovery self-efficacy  
 ADH = Adherence

**Colour Key:**

- Green signifies questions asked for this present study, labelled by section...
  - A = demographic
  - B = perceptions towards injury risk in rugby
  - C = perceptions towards injury prevention in rugby
  - D = baseline awareness and use of Activate
  - E = psychological variables/perceptions and Activate uptake
- Amber signifies questions asked for a sub-study, which were not included or analysed as part of this study.

**Table S2.** Baseline participant demographics

| Information/Question                                                | Response                  | Workshop Attendance |                 | Excluded from study |
|---------------------------------------------------------------------|---------------------------|---------------------|-----------------|---------------------|
|                                                                     |                           | No n (%)            | Yes n (%)       |                     |
| <b>School type</b>                                                  | Independent (private)     | 26 (74%)            | 36 (88%)        | 39 (83%)            |
|                                                                     | State (government funded) | 9 (26%)             | 5 (12%)         | 8 (17%)             |
| <b>Age of participant</b>                                           | Mean Age (SD)             | 36.8<br>(±10.8)     | 38.6<br>(±10.3) | 36.6<br>(±10.5)     |
| <b>What is your role?</b>                                           | Director of Sport/Rugby   | 5 (14%)             | 2 (5%)          | 2 (4%)              |
|                                                                     | Head Coach                | 15 (43%)            | 13 (32%)        | 20 (43%)            |
|                                                                     | Assistant Coach           | 7 (20%)             | 19 (46%)        | 14 (30%)            |
|                                                                     | Team manager              | 3 (9%)              | 5 (12%)         | 7 (15%)             |
|                                                                     | Strength and conditioner  | 2 (6%)              | 0 (0%)          | 0 (0%)              |
|                                                                     | Medical practitioner      | 3 (9%)              | 2 (5%)          | 4 (8%)              |
| <b>If coaching, what age groups do you coach?</b>                   |                           |                     |                 |                     |
|                                                                     | Under-12/13               | 2 (7%)              | 2 (6%)          | 4 (11%)             |
|                                                                     | Under-14/15               | 5 (19%)             | 11 (32%)        | 11 (31%)            |
|                                                                     | Under-16                  | 2 (7%)              | 3 (9%)          | 2 (6%)              |
|                                                                     | Under-17/18/19            | 8 (30%)             | 11 (32%)        | 6 (17%)             |
|                                                                     | Various                   | 10 (37%)            | 7 (21%)         | 13 (36%)            |
| <b>If coaching, how many years coaching experience do you have?</b> |                           |                     |                 |                     |
|                                                                     | Less than 2 years         | 3 (11%)             | 3 (9%)          | 6 (17%)             |
|                                                                     | 2-3 years                 | 1 (4%)              | 4 (12%)         | 4 (11%)             |
|                                                                     | 4-5 years                 | 3 (11%)             | 3 (9%)          | 3 (8%)              |
|                                                                     | 6+ years                  | 20 (74%)            | 24 (70%)        | 22 (61%)            |
|                                                                     | Unknown                   | 0 (0%)              | 0 (0%)          | 1 (3%)              |
| <b>If coaching, what is the highest level you have coached?</b>     |                           |                     |                 |                     |
|                                                                     | School/Club               | 12 (44%)            | 19 (56%)        | 20 (57%)            |
|                                                                     | Regional Junior Academy   | 5 (19%)             | 4 (12%)         | 3 (9%)              |
|                                                                     | County/ constituent body  | 4 (15%)             | 6 (17%)         | 4 (11%)             |
|                                                                     | Divisional                | 3 (11%)             | 3 (9%)          | 3 (9%)              |
|                                                                     | Professional              | 1 (4%)              | 1 (3%)          | 1 (3%)              |
|                                                                     | International             | 2 (7%)              | 1 (3%)          | 4 (11%)             |
| <b>What is the highest coaching qualification you hold?</b>         |                           |                     |                 |                     |
|                                                                     | RFU Level 1               | 2 (8%)              | 8 (24%)         | 4 (11%)             |
|                                                                     | RFU Level 2               | 11 (42%)            | 12 (36%)        | 17 (47%)            |
|                                                                     | RFU Level 3               | 7 (27%)             | 7 (21%)         | 5 (14%)             |
|                                                                     | RFU Level 4               | 3 (12%)             | 1 (3%)          | 2 (6%)              |
|                                                                     | None                      | 3 (12%)             | 5 (15%)         | 2 (6%)              |
|                                                                     | Unknown                   | 1 (4%)              | 1 (3%)          | 6 (17%)             |
| <b>When did you obtain this qualification?</b>                      |                           |                     |                 |                     |
|                                                                     | Less than 2 year ago      | 5 (22%)             | 9 (32%)         | 6 (23%)             |
|                                                                     | 2-3 years ago             | 3 (13%)             | 3 (11%)         | 4 (15%)             |
|                                                                     | 4-5 years ago             | 7 (30%)             | 5 (18%)         | 6 (23%)             |
|                                                                     | More than 5 years ago     | 8 (35%)             | 11 (39%)        | 10 (39%)            |
| <b>When did you last complete an official RFU course?</b>           |                           |                     |                 |                     |
|                                                                     | Never                     | 2 (6%)              | 4 (10%)         | 7 (15%)             |
|                                                                     | Less than 2 years ago     | 25 (71%)            | 28 (70%)        | 29 (62%)            |
|                                                                     | 2-3 years ago             | 4 (11%)             | 2 (5%)          | 5 (11%)             |
|                                                                     | 4-5 years ago             | 1 (3%)              | 3 (8%)          | 4 (8%)              |
|                                                                     | 6+ years ago              | 3 (9%)              | 3 (8%)          | 2 (4%)              |
| <b>Have you previously played competitive rugby?</b>                |                           |                     |                 |                     |

|                                                                                            |           |          |          |
|--------------------------------------------------------------------------------------------|-----------|----------|----------|
| No                                                                                         | 0 (0%)    | 5 (12%)  | 9 (19%)  |
| Yes                                                                                        | 35 (100%) | 36 (88%) | 38 (81%) |
| <b>If yes, what is the highest level you have played?</b>                                  |           |          |          |
| School                                                                                     | 2 (6%)    | 6 (17%)  | 6 (16%)  |
| Age group community club                                                                   | 1 (3%)    | 1 (3%)   | 2 (5%)   |
| Junior academy Rugby                                                                       | 1 (3%)    | 1 (3%)   | 1 (3%)   |
| University                                                                                 | 6 (17%)   | 4 (11%)  | 5 (13%)  |
| Adult community club                                                                       | 17 (49%)  | 19 (53%) | 17 (45%) |
| Professional                                                                               | 5 (14%)   | 3 (8%)   | 5 (13%)  |
| International                                                                              | 3 (9%)    | 2 (6%)   | 2 (5%)   |
| <b>Do you have a current medical or first aid qualification?</b>                           |           |          |          |
| No                                                                                         | 6 (28%)   | 15 (37%) | 15 (32%) |
| Yes                                                                                        | 29 (83%)  | 26 (63%) | 32 (68%) |
| <b>Have you ever used a specific programme to reduce injury risk amongst your players?</b> |           |          |          |
| No                                                                                         | 22 (63%)  | 24 (59%) | 27 (57%) |
| Yes                                                                                        | 13 (37%)  | 17 (41%) | 20 (43%) |

**Table S3.** Coach perceptions towards rugby injury risk and prevention at baseline and post-season.

| Statement                                                                                   | Workshop Attendance | Baseline |       | Post-season |     |
|---------------------------------------------------------------------------------------------|---------------------|----------|-------|-------------|-----|
|                                                                                             |                     | Median   | IQR   | Median      | IQR |
| Rugby injuries can shorten a player's career                                                | No                  | 1        | 1-2   | 2           | 1-2 |
|                                                                                             | Yes                 | 1        | 1-1.5 | 1           | 1-2 |
| Rugby injuries can cause physical problems later in life                                    | No                  | 1        | 1-2   | 2           | 1-2 |
|                                                                                             | Yes                 | 1        | 1-2   | 1           | 1-2 |
| Rugby injuries have a negative impact on team performance                                   | No                  | 2        | 2-5   | 3           | 2-3 |
|                                                                                             | Yes                 | 2        | 2-3   | 2           | 2-4 |
| Rugby injuries have a negative impact on a player's quality of life                         | No                  | 2        | 2-3   | 2           | 2-3 |
|                                                                                             | Yes                 | 2        | 2-3   | 2           | 2-3 |
| Rugby players are at high risk of suffering an injury                                       | No                  | 3        | 2-4   | 3           | 2-5 |
|                                                                                             | Yes                 | 2        | 2-3   | 2           | 2-5 |
| I expect a player I coach to sustain a injury sometime during the next season               | No                  | 2        | 2-3   | 2           | 2-4 |
|                                                                                             | Yes                 | 3        | 2-4   | 3           | 2-4 |
| It is possible to prevent some rugby injuries                                               | No                  | 2        | 1-2   | 2           | 1-2 |
|                                                                                             | Yes                 | 2        | 1-2   | 2           | 1-2 |
| <b>Exercises which have been shown to prevent injuries....</b>                              |                     |          |       |             |     |
| ...should be performed                                                                      | No                  | 2        | 1-2   | 1           | 1-2 |
|                                                                                             | Yes                 | 2        | 1-2   | 1           | 1-2 |
| ...varied and progressed                                                                    | No                  | 1        | 1-2   | 1           | 1-2 |
|                                                                                             | Yes                 | 2        | 1-2   | 2           | 1-2 |
| ...incorporated in schools training                                                         | No                  | 2        | 1-2   | 2           | 1-4 |
|                                                                                             | Yes                 | 2        | 1-2   | 1           | 1-2 |
| <b>Completing a rugby specific warm-up prior to every game and training session will...</b> |                     |          |       |             |     |
| ...reduce the risk of players sustaining an injury                                          | No                  | 2        | 1-2   | 2           | 2-2 |
|                                                                                             | Yes                 | 2        | 1-2   | 2           | 1-2 |
| ...improve physical characteristics such as balance, agility and strength                   | No                  | 2        | 2-3   | 2           | 2-3 |
|                                                                                             | Yes                 | 2        | 1-2   | 2           | 1-2 |
| Balance exercises can prevent Rugby injuries                                                | No                  | 2        | 2-3   | 2           | 2-3 |
|                                                                                             | Yes                 | 2        | 2-2   | 2           | 1-2 |
| Controlled jumping/landing exercises can prevent Rugby injuries                             | No                  | 2        | 2-3   | 2           | 1-3 |
|                                                                                             | Yes                 | 2        | 2-2   | 2           | 1-2 |
| A warm-up jog/run can prevent Rugby injuries                                                | No                  | 3        | 2-4   | 3           | 2-4 |
|                                                                                             | Yes                 | 3        | 2-4   | 3           | 2-3 |
| Cutting exercises can prevent Rugby injuries                                                | No                  | 3        | 2-4   | 2           | 2-3 |
|                                                                                             | Yes                 | 4        | 2-4   | 2           | 2-4 |
| Cool-down jog/run can prevent Rugby injuries                                                | No                  | 3        | 2-4   | 3           | 2-5 |
|                                                                                             | Yes                 | 3        | 2-3   | 2           | 2-3 |
| Resisted shoulder exercises can prevent shoulder injuries in Rugby                          | No                  | 2        | 2-3   | 2           | 2-3 |
|                                                                                             | Yes                 | 2        | 2-2.5 | 2           | 2-2 |
| Neck muscle strengthening can prevent concussion in Rugby                                   | No                  | 3        | 2-4   | 3           | 2-4 |
|                                                                                             | Yes                 | 2        | 2-4   | 2           | 2-3 |
|                                                                                             | No                  | 2        | 1-3   | 2           | 1-2 |



|                                                                                                                          |     |   |     |   |     |
|--------------------------------------------------------------------------------------------------------------------------|-----|---|-----|---|-----|
| I would like my team to complete a Rugby specific warm-up programme prior to every game and training session next season | Yes | 2 | 1-2 | 2 | 1-2 |
|--------------------------------------------------------------------------------------------------------------------------|-----|---|-----|---|-----|
